1 **Analysis of phylogenetic relationships and genome size evolution**  
2 **of the *Amaranthus* genus using GBS indicates the ancestors of**  
3 **an ancient crop**

4 Markus G. Stetter, and Karl J. Schmid

5 Institute of Plant Breeding, Seed Science and Population Genetics, University of Hohenheim,  
6 Fruwirthstr. 21, 70599 Stuttgart / Germany

7 **Keywords**

8 Amaranth, genotyping by sequencing, multispecies coalescent, flow cytometry, *Amaranthus cau-*  
9 *datu*, *Amaranthus cruentus*

10 **Corresponding Author**

11 Name: Karl Schmid

Address: Institute of Plant Breeding, Seed Science and Population Genetics (350)

University of Hohenheim

Fruwirthstraße 21

D-70599 Stuttgart / Germany

Tel: +49 711 459 23487

Fax: +49 711 459 24458

E-Mail address: karl.schmid@uni-hohenheim.de

12 Running title: *Amaranthus* phylogeny

13 **Abstract**

14 The genus *Amaranthus* consists of 50 to 70 species and harbors several cultivated and  
15 weedy species of great economic importance. A small number of suitable traits, phenotypic  
16 plasticity, gene flow and hybridization made it difficult to establish the taxonomy and phy-  
17 logeny of the whole genus despite various studies using molecular markers. We inferred the  
18 phylogeny of the *Amaranthus* genus using genotyping by sequencing (GBS) of 94 genebank  
19 accessions representing 35 *Amaranthus* species and measured their genome sizes. SNPs were  
20 called by *de novo* and reference-based methods, for which we used the distant sugarbeet  
21 *Beta vulgaris* and the closely related *Amaranthus hypochondriacus* as references. SNP counts  
22 and proportions of missing data differed between methods, but the resulting phylogenetic  
23 trees were highly similar. A distance-based neighbor joining tree of individual accessions and  
24 a species tree calculated with the multispecies coalescent supported a previous taxonomic  
25 classification into three subgenera although the subgenus *A. Acnida* consists of two highly  
26 differentiated clades. The analysis of the Hybridus complex within the *A. Amaranthus* sub-  
27 genus revealed insights on the history of cultivated grain amaranths. The complex includes  
28 the three cultivated grain amaranths and their wild relatives and was well separated from  
29 other species in the subgenus. Wild and cultivated amaranth accessions did not differentiate  
30 according to the species assignment but clustered by their geographic origin from South and  
31 Central America. Different geographically separated populations of *Amaranthus hybridus*  
32 appear to be the common ancestors of the three cultivated grain species and *A. quitensis*  
33 might be additionally be involved in the evolution of South American grain amaranth (*A.*  
34 *caudatus*). We also measured genome sizes of the species and observed little variation with  
35 the exception of two lineages that showed evidence for a recent polyploidization. With the  
36 exception of two lineages, genome sizes are quite similar and indicate that polyploidization  
37 did not play a major role in the history of the genus.

## 38 1 Introduction

39 The *Amaranthus* genus has a world-wide distribution and harbors between 50 and 70 species.  
40 The taxonomic differentiation of these species has proven difficult because only few traits are  
41 suitable for this purpose despite a high phenotypic diversity. In addition, there is a high level of  
42 phenotypic plasticity and a propensity to form interspecific hybrids and hybrid swarms (Brenner  
43 et al., 2013; Greizerstein and Poggio, 1994; Wassom and Tranel, 2005). Fertile hybrids can  
44 be obtained in crosses of distant species from different subgenera (Trucco et al., 2005). This  
45 disposition for natural hybridization further complicates the taxonomic differentiation of species.  
46 Several species in the genus are of high economic importance and they include grain and vegetable  
47 crops as well as invasive weeds (Costea and DeMason, 2001; Sauer, 1967). The three species  
48 *A. cruentus*, *A. hypochondriacus* and *A. caudatus* are cultivated in South and Central America  
49 for grain production. Together with their wild relatives *A. hybridus* and *A. quitensis* they form  
50 the Hybridus species complex and the latter two species have been suggested as ancestors of the  
51 three grain amaranth species, but the domestication history of amaranth is still under debate  
52 (Kietlinski et al., 2014; Sauer, 1967). *A. tricolor* is cultivated as leaf vegetable in Africa and  
53 Asia, in addition to *A. cruentus*, *A. dubius* and *A. hybridus*, which are also used as vegetable  
54 crops. Both seeds and leaves are high in micronutrients with a favorable amino acid composition  
55 (Rastogi and Shukla, 2013) and are therefore promoted as valuable crops for cultivation outside  
56 their native ranges. Appropriate cultivation conditions and protocols for efficient crosses allow  
57 to establish breeding programs to achieve this goal by breeding improved varieties of grain  
58 amaranths (Stetter et al., 2016). Weedy amaranths are the other group of economically and  
59 agronomically important species in the genus. The best known is Palmer amaranth (*A. palmeri*)  
60 because of its tolerance of the herbicide glyphosate. For example, yield losses in soybean fields  
61 due to Palmer amaranth infestation can range from 30 to 70 % (Bensch et al., 2003; Davis et al.,  
62 2015). Other weedy species of the genus include *A. tuberculatus*, *A. rudis* and *A. retroflexus*,  
63 which also lead to substantial yield losses in a diversity of crops (Bensch et al., 2003; Steckel  
64 and Sprague, 2004).

65 The taxonomy and phylogeny of the genus was investigated using phenotypic traits and genetic  
66 markers. The most recent taxonomic revision defined three subgenera that include *Amaran-*

67 *thus Albersia, Amaranthus Acnida and Amaranthus Amaranthus* (Costea and DeMason, 2001;  
68 Mosyakin and Robertson, 1996). Previous studies with different genetic marker systems could  
69 not identify a consistent phylogeny of the genus that corresponds with the taxonomic classifica-  
70 tion (Lanoue et al., 1996; Chan and Sun, 1997; Wassom and Tranel, 2005; Das, 2014). Due to the  
71 difficulty of differentiating *Amaranthus* species by phenotypic traits, a total number 70 named  
72 species may be an overestimate if different populations of the same or closely related subspecies  
73 as well as hybrids are classified as different species. Almost 40 species are currently stored in the  
74 US (USDA/ARS) and German (IPK Gatersleben) *ex situ* genebanks and are readily available  
75 for taxonomic and phylogenetic analyses. A phylogeny of these species based on genome-wide  
76 genetic markers has the potential to improve the taxonomic classification and evolution of the  
77 whole genus beyond the grain amaranths and their close relatives, which are currently the best  
78 studied species (Jimenez et al., 2013; Xu and Sun, 2001). The rapid development of sequencing  
79 technology allows to utilize genome-wide polymorphisms from different species for phylogenetic  
80 analysis. Reduced representation sequencing methods, such as genotyping by sequencing (GBS)  
81 can provide thousands of single nucleotide polymorphisms (SNPs) for genetic analysis (Elshire  
82 et al., 2011; Poland et al., 2012) although for non- model species SNP detection can be chal-  
83 lenging without a reference genome. In such species SNPs are identified by using the reference  
84 sequence of a different, but closely related species, or the *de novo* assembly of sequencing reads  
85 (Catchen et al., 2011, 2013). Despite these limitations, GBS and related RADseq approaches  
86 have been used for phylogenetic analyses of both closely and distantly related taxa (Ariani et al.,  
87 2016; Eaton and Ree, 2013; Harvey et al., 2016; Nicotra et al., 2016)

88 Several software tools were developed for phylogenetic analyses based on biallelic markers. For  
89 example, SNAPP (SNP and AFLP Package for Phylogenetic analysis) infers species trees directly  
90 from biallelic markers by implementing a full multispecies coalescent model (Bryant et al., 2012).  
91 It integrates over all possible trees instead of sampling them explicitly, which results in a high  
92 statistical power, but is computationally expensive because it scales with the number of samples  
93 and markers (Paul et al., 2013).

94 The availability of a phylogenetic tree for a taxon allows to test hypotheses regarding pheno-  
95 typic traits or other characters of interest. Species in the genus *Amaranthus* show variation in  
96 several traits such as C<sub>4</sub> vs. C<sub>3</sub> carbon fixation, reproductive system (monoecious vs. dioe-

97 cious) and genome duplication. The latter process is commonly observed in plants and the  
98 genus *Amaranthus* is no exception because it is considered to be a paleoallotetraploid with  
99 a genome duplication between 36.7 and 67.9 Ma ago (Clouse et al., 2016). Haploid chromo-  
100 some numbers reported for *Amaranthus* species are 16 and 17 (Greizerstein and Poggio, 1994,  
101 <http://data.kew.org/cvalues>), which indicates a cytological stability within the genus although  
102 there are several tetraploid species like *A. dubius* and *A. australis*, which likely have a different  
103 genome size or structure. Therefore, the variation of genome size within a genus is an interesting  
104 trait for analysis in the context of species formation and other phenotypic or ecological traits.

105 In this study we inferred the phylogeny of the genus *Amaranthus* using molecular markers and  
106 analyzed genome size variation to identify putative polyploidization events that may have played  
107 a role in speciation or influenced ecological traits. Of particular interest was the relationship  
108 of cultivated amaranths with their ancestors because the domestication history is not well un-  
109 derstood. A genus-wide phylogeny may identify the ancestors of this ancient crop and allow to  
110 consider the evidence in the light of previous domestication models. Furthermore, the relation-  
111 ship of herbicide resistant weed species with their relatives will identify species that allow to  
112 conduct comparative analyses to identify the evolutionary basis of herbicide resistance. Previ-  
113 ously a diversity of molecular methods were used to infer a phylogeny of the *Amaranthus* genus  
114 that include seed proteins, RAPDs, AFLPs and SSRs (Chan and Sun, 1997; Khaing et al., 2013;  
115 Kietlinski et al., 2014). Most of these studies were applied to a subset of the species of the genus  
116 and gave inconsistent results (reviewed by Trucco and Tranel, 2011). In this study, we inferred  
117 a molecular phylogeny using a significantly larger number of species than previous studies using  
118 thousands of genome-wide markers identified with GBS. To evaluate the robustness of the phy-  
119 logenetic analysis we compared different SNP calling methods that rely on reference sequences  
120 of distant relatives or on a *de novo* assembly of sequenced regions.

## 2 Material and Methods

### 2.1 Plant material

We obtained a total of 94 accessions representing 35 *Amaranthus* species from the USDA/ARS genebank and the German genebank at IPK Gatersleben (Table 1). Plants were grown under controlled conditions in standard gardening soil before leaves of young plantlets were collected for DNA and cell extraction. For genome size measurements all accessions were grown in two independent replicates.

### 2.2 DNA extraction and sequencing

Genomic DNA was extracted with the Genomic Micro AX Blood Gravity kit (A&A Biotechnology, Poland) using CTAB extraction buffer for cell lysis (Saghai-Marroof et al., 1984). Double-digest genotyping by sequencing libraries (GBS) were constructed as described previously (Stetter et al., 2015). For each accession two samples with different barcodes were prepared to assure sufficient sequencing output per accession. Fragment sizes between 250 and 350 bp were selected with BluePippin (Sage Science, USA) and the resulting libraries were single-end sequenced to 100 bp on one lane of a Illumina HiSeq 2500 (Eurofins Genomics GmbH, Germany).

### 2.3 Data preparation and filtering

Raw sequence data were processed with a custom GBS analysis pipeline. First, reads were sorted into separate files according to their barcodes using Python scripts. Subsequently, read quality was assessed with fastQC (<http://www.bioinformatics.babraham.ac.uk/projects/fastqc/>). Due to lower read quality towards the end of reads, they were trimmed to 90 bp. Low quality reads were excluded if they contained at least one N (undefined base) or if the quality score after trimming was below 20 in more than 10% of the bases. Replicated data per accession were combined and subsequently analyzed as one sample.

## 144 **2.4 *de novo* and reference-based SNP discovery**

145 We used two different methods to call SNPs from the sequencing data, a *de novo* approach  
146 using Stacks 1.35 and an alignment to a reference genome. For the *de novo* approach we used  
147 the `denovo_map.pl` pipeline provided by Stacks to call SNPs directly from the processed data  
148 (Catchen et al., 2011, 2013). Highly repetitive GBS reads were removed in the `ustacks` program  
149 with option `-t`. Additionally, we analyzed data with two different minimum number of identical  
150 raw reads ( $m = 3$  and  $m = 7$ ) required to create a stack. These two settings resulted in different  
151 results in the SNP calling (Mastretta-Yanes et al., 2015) and we therefore used both settings  
152 for comparison. Two mismatches were allowed between loci when processing a single individual,  
153 and four mismatches between loci when building the catalog, which is the set of non redundant  
154 loci based on all accessions and is used as reference for SNP calling. SNPs were called with the  
155 Stacks tool populations 1.35 with filtering for different levels of missing values.

156 In addition to the *de novo* approach we used the sugar beet (*Beta vulgaris*) RefBeet-1.2 (Dohm  
157 et al., 2014) and the *Amaranthus hypochondriacus* draft genome (Clouse et al., 2016) as reference  
158 genomes to align sequence reads with `bwa mem` (Li and Durbin, 2009). SNPs were called with  
159 `samtools 1.2` (Li et al., 2009). The resulting SNPs were filtered for different levels of missing  
160 values at a locus with `vcftools` (Danecek et al., 2011).

## 161 **2.5 Phylogenetic analysis methods**

162 We constructed a neighbor joining tree with 1000 bootstraps from the pairwise Euclidean dis-  
163 tance between all 94 individuals based the four datasets using the R package `ape` (Paradis et al.,  
164 2004) and calculated an uncorrected neighbor joining network using the NeighborNet algorithm  
165 (Bryant and Moulton, 2004) with `SplitsTree4` (Huson and Bryant, 2006).

166 We also used the multi-species coalescent implemented in SNAPP, which is part of the BEAST  
167 package, to infer species trees directly from unlinked biallelic markers (Bouckaert et al., 2014;  
168 Bryant et al., 2012). We reduced the number of individuals to a maximum of four per species  
169 because the SNAPP algorithm is computationally expensive. Additionally, we imputed the  
170 reference-map based datasets with `beagle` (Browning and Browning, 2016) before thinning all  
171 four datasets with `vcftools` (Danecek et al., 2011) to a distance of 100 bp which excludes multiple

172 SNPs per GBS read. Since GBS loci are essentially randomly distributed throughout genome,  
173 we assumed that the assumption of unlinked biallelic markers was fulfilled after this filtering  
174 step. VCF files were converted to nexus format using a Python script and BEAST input files  
175 were created from these using BEAUti (Bouckaert et al., 2014). Mutation rates were calculated  
176 with BEAUti and default parameters were used for SNAPP. We conducted ten runs per dataset.  
177 Log files were analyzed with tracer 1.6 to examine convergence and converging log and tree  
178 files were combined using LogCombiner with 15% burn-in. The effective sample size (ESS) was  
179 adequate ( $> 200$ ) for the important parameters but was lower for some  $\theta$  values. We proceeded  
180 with the analysis as the low  $\theta$  values should not influence the tree topology (Nicoltr et al., 2016).  
181 TreeAnnotator was used to construct the 'Maximum clade credibility' tree and annotate it with  
182 posterior probabilities.

## 183 2.6 Genome size measurements and phylogenetic analysis

The genome sizes of 84 accessions representing 34 species were measured with flow cytometry and two independent replicates for each accession (Table 1). The tomato cultivar *Solanum lycopersicum* cv Stupicke was used as internal standard, due to its comparable genome size (DNA content = 1.96 pg; Dolezel et al., 1992). For the measurement, fresh leaves were cut up with a razor blade and cells were extracted with CyStain PI Absolute P (Partec, Muenster/Germany). Approximately 0.5 cm<sup>2</sup> of the sampled leaf was extracted together with a similar area of the tomato leaf in 0.5 ml of extraction buffer. The DNA content was determined with CyFlow Space (Partec, Muenster/Germany) flow cytometer and analyzed with FlowMax software (Partec, Muenster/Germany). For each sample, 10,000 particles were measured. The DNA content was calculated as:

$$\text{DNA content } 2C \text{ [pg]} = \text{genome size tomato} \times \frac{\text{fluorescence amaranth}}{\text{fluorescence tomato}} \quad (1)$$

and the genome size (in Mbp) was calculated as:

$$\text{genome size } 1C \text{ [Mbp]} = (0.978 \times 10^3) \times \frac{\text{DNA content } 2C \text{ [pg]}}{2} \quad (2)$$



184 The conversion from pg to bp was calculated with  $1 \text{ pg DNA} = 0.978 \times 10^9 \text{ bp}$  (Dolezel et al.,  
185 2003). Means were calculated using R software (R Core Team, 2014) and an ANOVA was  
186 performed to infer differences in genome size for the species.

187 We combined the genomic data with the genome size measurements to study the genome size  
188 evolution. The 1 C genome sizes (Mbp) were mapped on the phylogeny using parsimony re-  
189 construction in Mesquite 3.04 (<http://mesquiteproject.org>). In addition we used the fastAnc  
190 function from the phytools R package to conduct a Maximum Likelihood reconstruction of an-  
191 cestral states (genome sizes) with default parameters (Revell, 2012). For this analysis we inferred  
192 the genome size of *A. acanthochiton* as the mean between its two closest related species (*A. bli-*  
193 *tum* and *A. lividus*) because fastAnc does not allow missing values. A Brownian motion model  
194 implemented in the fastBM function in phytools (Revell, 2012) was used to simulate the random  
195 evolution of genome size over the tree. 1000 simulations were run and by using the distribution  
196 of genome sizes for each branch in the phylogeny the 0.25% and 97.5% were used to conduct a  
197 two-tailed test whether observed genome sizes were significantly smaller or larger than simulated  
198 sizes.

## 199 **2.7 Data availability**

200 Sequence reads were submitted to the European Nucleic Archive (ENA) under accession number  
201 XXX. Analysis scripts, aggregated sequencing data and genome size raw data are available under  
202 Dryad (<http://datadryad.org/>) DOI XXX

## 3 Results

### 3.1 SNP discovery

Until reference genomes for any species can be created on a routine basis, methods like genotyping by sequencing (GBS) are an efficient method to survey genome-wide diversity in non-model species. To compare the use of GBS with and without a reference sequence for phylogenetic reconstruction of the *Amaranthus* genus, we used different methods and reference sequences for SNP calling. The number of aligned reads differed strongly between the *Beta vulgaris* and *Amaranthus hypochondriacus* references. Only 25.9% of the reads aligned to sugar beet and 74.8% to *A. hypochondriacus* (Table 2), which resulted in different SNP numbers. We identified 23,128 SNPs with the sugar beet and 264,176 SNPs with the *A. hypochondriacus* reference genomes. GBS data have a high proportion of missing values and the number of SNPs retained depends on the allowed proportion of missing values per SNP (Figure 1). For example, if no missing values are allowed only one SNP remained with the sugar beet and 247 SNPs with the *A. hypochondriacus* reference.

The *de novo* assembly with Stacks allowed us to use all reads for SNP detection at the cost that resulting contigs are unsorted and without position information on a reference genome. The minimum number of identical raw reads required to create a stack influences the SNP detection (Mastretta-Yanes et al., 2015). With a minimum number of three reads ( $m = 3$ ) we obtained 505,981, and with seven reads ( $m = 7$ ) 371,690 SNPs. After filtering out loci with missing values,  $m = 3$  retained 949 and  $m = 7$  retained 1,605 SNPs. The total number of SNPs recovered was higher for  $m = 3$ , but the number of SNPs without missing values was higher for  $m = 7$ . The two parameter values ( $m = 3$  and  $m = 7$ ) resulted in the same number of SNPs if a proportion of 20 to 30 % missing values per site were allowed. With both parameter values the *de novo* approach resulted in more SNPs than the reference-based SNP (Table 2). We were able to retain a large number of SNPs if missing data in one individual per GBS locus were allowed, which corresponds to a cutoff of 2% missing values (Figure 1). For the phylogenetic analysis of the reference-based datasets we allowed 10% (sugar beet reference) and 50% missing values (*A. hypochondriacus* reference). The resulting total number of missing values ranged from 0.6% for the *de novo* to 31.7% for the dataset based on the sugarbeet reference (Table 2). For the

232 consecutive analyses we used all four datasets but in the following we present only the results  
233 obtained with the SNP data from the mapping against the *A. hypochondriacus* reference and  
234 include the other results as supplementary information because the results from all four data  
235 sets are very similar.

## 236 **3.2 Phylogenetic inference**

### 237 **3.2.1 Neighbor joining phylogeny**

238 The neighbor joining phylogeny based on Euclidean distances of allelic states shows that most  
239 accessions cluster with other accessions from the same species (Figure 2). Within the Hybridus  
240 complex, however, there is no strong separation of the species into different clusters. Based  
241 on the species names, four clades are expected, but only three are observed. The first consists  
242 of *A. caudatus*, *A. quitensis* and *A. hybridus* that all originated from South America. The  
243 second clade includes *A. cruentus*, *A. hypochondriacus*, *A. hybridus*, which originated from  
244 Mexico, one *A. quitensis* accessions from Brazil and two hybrid accessions likely formed from  
245 species of the Hybridus complex. The third clade is formed by *A. cruentus*, *A. hypochondriacus*  
246 and *A. hybridus*, as well as two hybrids, and one *A. dubius* individual (242\_dub; Figure 3).  
247 The accessions in this clade originated from Mexico, with the exception of two accessions of  
248 *A. cruentus* from Guatemala and one from Peru, and one *A. hypochondriacus* accession from  
249 Brazil. The NeighborNet network confirms this pattern and in addition outlines the extent of  
250 conflicting phylogenetic signals among accessions that may reflect gene flow or hybridization  
251 (Figure 3). The three accessions of the leaf vegetable amaranth *A. tricolor* cluster closely and  
252 form a clade with other *Amaranthus* species.

253 Although the ability to resolve species level relationships seems to be limited with our data, the  
254 neighbor joining tree is consistent with the taxonomic classification into three subgenera that  
255 was previously defined using morphological traits (Figures 2 and S1). The phylogenies resulting  
256 from the four different SNP calling methods are highly similar and show that the tree topology  
257 of the genus is highly robust with respect to the SNP calling method (Figure S2).

### 258 **3.2.2 Phylogeny based on the multispecies coalescent**

259 For inferring the phylogeny with the multispecies coalescent implemented in the SNAPP program  
260 we used a subset of individuals for two reasons. First, there were more individuals of the species  
261 from the Hybridus complex than of the other species which may bias the analysis, and second  
262 because the computation time scales exponentially with the number of individuals. Therefore we  
263 randomly sampled four individuals in those species with more than four genotyped accessions.  
264 The combined chain length without burn-in was 3,980,000 for the SNP data based on the *A.*  
265 *hypochondriacus* reference. The cloudogram derived from the SNAPP analysis allows to identify  
266 the degree of uncertainty for several clades in the tree (Figure 4). For the group of species that  
267 include *A. tricolor* and *A. crispus* there was a high uncertainty between the species. Within the  
268 Hybridus complex the uncertainty was high among the cultivated *A. caudatus* and its putative  
269 wild ancestors *A. quitensis* and *A. hybridus*. In contrast, the split between these three South  
270 American species and the Central American species *A. cruentus* and *A. hypochondriacus* was  
271 strongly supported. Overall, the Hybridus complex is well separated from the other species  
272 (Figure 4 and 5).

### 273 **3.3 Genome size evolution**

274 The genome size measurements differed among the *Amaranthus* species although the range of  
275 variation was quite narrow (Table 3). Palmer amaranth has the smallest genome with a size of  
276 421 Mbp, and *A. australis* the largest genome of 824 Mbp, which about twice the size of Palmer  
277 amaranth. Most species including the Hybridus complex had a genome size close to 500 Mbp  
278 (Table 3).

279 To test whether changes in genome sizes in the phylogeny reflect random evolution or non-  
280 neutral processes, we mapped the genome sizes to the phylogenetic tree obtained with SNAPP  
281 (Figures 5 and S3). There was a tendency for decreasing genome sizes within the *Amaranthus*  
282 subgenus, and a high variation of genome sizes within the *Acnida* subgenus because it included  
283 both the individuals with the smallest and largest genome sizes. Figure 5 further shows that  
284 *A. dubius* has a larger genome than the other species of the *Amaranthus* subgenus.  
285 Even though there were significant differences in genome size between species, the ancestral

286 branches have wide confidence intervals and significantly differ in recent splits but not in early  
287 ones (Figures S4 and S5). The ancestral genome size was inferred by fastAnc as 569 Mbp,  
288 but with a large confidence interval of 416 Mbp to 722 Mbp that includes almost all empirical  
289 genome size measurements of the extant species. Using a Brownian motion model we tested  
290 whether genome sizes differed in individual branches of the phylogeny given the complete tree.  
291 Several branches in the tree differ from such a random process. The lineage leading to *A. tricolor*  
292 and *A. australis* show significantly larger genome sizes that suggest that polyploidization likely  
293 influenced the genome sizes of these species. In contrast, the lineage leading to the weed *A.*  
294 *palmeri* has a significantly smaller genome size. The two clades of the *A. Acnida* subgenus  
295 consist of three species each. They are not only strongly separated according to the molecular  
296 phylogeny but also show different average genome sizes.

## 297 4 Discussion

### 298 4.1 Reference-based versus reference-free SNP calling

299 Genotyping by Sequencing (GBS) identifies thousands of markers but usually requires a reference  
300 sequence for mapping sequence reads. *De novo* methods allow to call SNPs without a reference  
301 genome. We compared both approaches to determine their efficiency in SNP identification. With  
302 the distant sugar beet genome as a reference only 26% of the sequencing reads could be used  
303 for SNP calling because the sequence divergence between sugar beet and *Amaranthus* species is  
304 too high for an efficient mapping despite the high synteny between *Amaranthus* and sugar beet  
305 (Clouse et al., 2016). This resulted in a small number of SNPs available for phylogenetic analysis.  
306 In contrast, the *de novo* assembly used all data and the number of SNPs obtained was even larger  
307 than from the mapping against the *A. hypochondriacus* genome. The proportion of missing  
308 data was also highest with the evolutionary distant sugar beet reference genome. Comparisons  
309 of different values for the number of identical reads (`-m` parameter) in Stacks showed that a  
310 smaller number of identical reads produced more SNPs, but we obtained more SNPs without  
311 missing values when requiring a larger number of identical reads, in accordance to earlier studies  
312 (Mastretta-Yanes et al., 2015). A reference genome from the same or a closely related species  
313 combines the advantage of a larger SNP number with linkage information (Andrews et al., 2016).  
314 Since the level of evolutionary divergence within the genus is unknown and only one reference  
315 sequence from an amaranth species was available, we compared the different approaches. Taken  
316 together, a comparison of the four SNP calling approaches with different numbers of SNPs and  
317 different levels of missing data showed that the resulting neighbor joining tree of the genus was  
318 quite robust with respect to SNP calling parameters, because it did not differ strongly between  
319 datasets (Figure S1). A major disadvantage of the *de novo* approach is that information about  
320 physical map positions of SNPs is missing and it can not be tested whether SNPs are unlinked.  
321 To increase the chance that SNPs are unlinked, which is a requirement of the SNAPP algorithm,  
322 we used a double-digest protocol for GBS and filtered for one SNP per GBS locus, which should  
323 allow the reconstruction of the phylogeny using the multispecies coalescent method (Andrews  
324 et al., 2016; Bryant et al., 2012; DaCosta and Sorenson, 2016). Such an approach was shown  
325 to be suitable for the phylogenetic reconstruction of Australian *Pelargonium* using RADseq data

326 (Nicotra et al., 2016).

## 327 **4.2 Phylogeny of the whole *Amaranthus* genus**

328 The species-rich genus *Amaranthus* has been divided into the three subgenera, *Amaranthus*,  
329 *Acnida* and *Albersia*. Several studies investigated species relationships in the genus using molec-  
330 ular markers, but most included only few species and did not allow conclusions for the whole  
331 genus (Chan and Sun, 1997; Lanoue et al., 1996; Kietlinski et al., 2014; Xu and Sun, 2001).  
332 We included all species that are currently available as *ex situ* conserved germplasm and geno-  
333 typed several accessions per species to evaluate their evolutionary relationship (Figure 2). As  
334 expected, most accessions from the same species clustered together, and the subdivision of the  
335 genus into three subgenera based on phenotypic traits is largely consistent with our molecular  
336 data, although we observed some notable exceptions which we discuss below.

337 The species tree obtained with SNAPP largely reflects the neighbor joining tree which is based  
338 on individual accessions, but the cloudogram of all sampled species trees indicates uncertainties  
339 in the positioning of species like *A. deflexus*, *A. tricolor* and *A. crispus* in the tree topology  
340 (Figure 4). In contrast, a clustering of the genus into four basal clades is strongly supported  
341 (Figures 4 and 5). We compared our phylogeny with the published taxonomy of the *Amaran-*  
342 *thus* genus (Mosyakin and Robertson, 1996). The subgenera *Amaranthus Amaranthus* and *A.*  
343 *Albersia* show a clear split at the root of the tree, but *A. Acnida* is split into two separate  
344 clades (Figure 5). The species of *A. Acnida* were categorized as dioecious and grouped based on  
345 this trait (Mosyakin and Robertson, 1996) although *A. palmeri* and *A. tuberculatus* were later  
346 described to be phylogenetically divergent (Wassom and Tranel, 2005). Another explanation for  
347 the observed split of *A. Acnida* species into two major groups may reflect the polyploid genomes  
348 of *A. tuberculatus*, *A. floridanus* and *A. australis* (see below). In our analysis, we treated all  
349 species as diploid and allowed only biallelic SNPs but polyploids may be characterized by high  
350 levels of heterozygosity and harbor multiallelic SNPs, which are excluded from further analysis.  
351 Both factors may bias a phylogenetic inference. On the other hand, a high proportion of het-  
352 erozygous loci would result in grouping the polyploid species in the same main branch as their  
353 ancestors or closest relatives. We conclude, however, that their grouping is correct because the  
354 posterior probabilities for the placement of these species in the phylogeny are very high.

### 355 4.3 Phylogenetic analysis of the Hybridus complex

356 The Hybridus complex contains the domesticated grain amaranths and putative ancestors such  
357 as *A. hybridus*. Previous studies suggested that the Hybridus complex comprises two clades  
358 (Adhikary and Pratt, 2015). We also identified the two clades, and in addition a third clade,  
359 which appears to be an intermediate of the other two other. It includes accessions from different  
360 species from Hybridus complex plus accessions that were labeled as 'hybrids' in the passport  
361 data and may have originated from interspecific hybridization. Interestingly, *A. hybridus* and  
362 *A. quitensis* accessions occur in all three clades (Figure 2), which may be explained by the  
363 geographic origin and geographic differentiation of these species. We previously suggested that  
364 *A. quitensis*, which is endemic to South America, and *A. hybridus* populations from the same  
365 region are a single species with a strong differentiation of geographically separated subpopula-  
366 tions within South America (Stetter et al., 2015). Since such a taxonomic grouping is still under  
367 debate and *A. quitensis* might be a separate subspecies of *A. hybridus*, we treated them as sepa-  
368 rate species in the phylogenetic analysis as was done before (Coons, 1978, 1982; Kietlinski et al.,  
369 2014). A comparison of the position of individual *A. hybridus* and *A. quitensis* accessions in  
370 the neighbor joining tree with the species tree obtained with SNAPP showed that in the former,  
371 the two species are not strongly differentiated from each other (Figure 2) whereas they form  
372 independent lineages in the species tree, but are closely related and in a monophyletic group  
373 with the three grain amaranths (Figure 5). This may be explained by the fact that SNAPP uses  
374 pre-defined groups which forces the algorithm to separate the species and therefore does not  
375 allow to evaluate whether *A. quitensis* can be considered as a separate species or is a subspecies  
376 with a high level of admixture.

377 The taxonomic interpretation of species relationships in the Hybridus complex is further com-  
378 plicated by the geographic origin of the accessions used in this study and by the effects of  
379 domestication. Sauer (1967) suggested that both *A. hybridus* and *A. quitensis* may have been  
380 involved in the domestication of the grain amaranths. Our analysis is consistent with this notion  
381 because the three grain amaranths *A. caudatus*, *A. cruentus* and *A. hypochondriacus* and their  
382 wild relatives *A. hybridus* and *A. quitensis* are separated from the other amaranths. The species  
383 tree suggests that both wild species are more closely related to the South American *A. caudatus*  
384 than to the Central American *A. cruentus* and *A. hypochondriacus*, but the neighbor joining



385 tree of individual accessions splits *A. hybridus* accessions by their geographic origin and clusters  
386 *A. hybridus* accessions collected in South America with the South American *A. caudatus* and  
387 *A. quitensis* and *A. hybridus* accessions collected in Central America with *A. cruentus* and *A.*  
388 *hypochondriacus*, which also are native to Central America (Figure 3).

389 Most evidence published so far suggests that *A. hybridus* is the direct ancestor of all three  
390 cultivated grain amaranth species (Chan and Sun, 1997; Kietlinski et al., 2014; Park et al.,  
391 2014; Stetter et al., 2015). *A. quitensis* is closely related to *A. caudatus* (Park et al., 2014; Xu  
392 and Sun, 2001; Stetter et al., 2015) and a low support of the split between *A. caudatus* and *A.*  
393 *quitensis* (Figures 4 and 5) reflects gene flow (Stetter et al., 2015) or indicates that *A. quitensis*  
394 is an intermediate between the wild *A. hybridus* and cultivated *A. caudatus* because it grows as  
395 weed in close proximity to grain amaranth fields and could have hybridized with *A. caudatus*.  
396 Another species for which a role in the domestication of grain amaranth was postulated is *A.*  
397 *powelli* (Sauer, 1967). In our analysis *A. powelli* is not closely related to the cultivated grain  
398 amaranths and therefore less likely a direct ancestor of *A. hypochondriacus* as proposed before  
399 (Park et al., 2014; Sauer, 1967; Xu and Sun, 2001).

400 Taken together, our analysis of the Hybridus complex is consistent with previous molecular phy-  
401 logenies (Chan and Sun, 1997; Khaing et al., 2013) but we note that the GBS-based phylogenies  
402 show a weaker genetic differentiation between the different species of the complex. In addition,  
403 both *A. caudatus* and *A. hypochondriacus* are more closely related to *A. hybridus* than to each  
404 other, which was observed before (Chan and Sun, 1997; Kietlinski et al., 2014). The *A. hybridus*  
405 accessions show a strong split along the North-South gradient (i.e., Central vs. South America),  
406 which supports the hypothesis that two different *A. hybridus* lineages were the ancestors of the  
407 three grain amaranths with a possible contribution of *A. quitensis* in the domestication of *A.*  
408 *caudatus* (Trucco and Tranel, 2011; Kietlinski et al., 2014; Adhikary and Pratt, 2015). Such  
409 a strong geographic pattern shows that in future studies requires a comprehensive geographic  
410 sampling to understand the evolutionary history of these species.

#### 411 4.4 Genome size evolution

412 The *Amaranthus* genes has undergone a whole genome duplication before speciation which was  
413 then followed by further duplication, chromosome loss and fusion events (Behera and Patnaik,  
414 1982; Clouse et al., 2016). The mapping of genome size measurements onto the phylogeny  
415 revealed that the subgenus *Amaranthus* has a tendency towards smaller genomes, whereas species  
416 in the *Albersia* clade show increased genome sizes (Figure 5). These patterns are not strong and  
417 uniform within groups, however, because *A. dubius* has a larger genome size than expected for  
418 the clade. It may result from a genome duplication and a subsequent speciation of *A. dubius*,  
419 which is tetraploid (Behera and Patnaik, 1982). The genome size of *A. dubius* is not exactly  
420 twice the size of closely related species and indicates a loss of DNA after duplication. A similar  
421 pattern was observed in the genus *Chenopodium* which also belongs to the *Amaranthaceae*  
422 (Kolano et al., 2016).

423 Chromosome numbers in the Hybridus complex species are variable. *A. cruentus* has 17, and  
424 the other species 16 chromosomes (Greizerstein and Poggio, 1994), although it does not seem  
425 to strongly influence genome sizes (Greizerstein and Poggio, 1994; Stetter et al., 2015, Table 3).  
426 For some species we observed a strong deviation in genome sizes from previously reported values.  
427 The genome sizes of *A. caudatus*, *A. cruentus* and *A. hypochondriacus* are within the previously  
428 reported range of 465 to 611 Mbp, but the genome sizes of *A. retroflexus*, *A. spinosus* and *A.*  
429 *tricolor* were about 200 Mb smaller than previous values. We also found that the five species of  
430 the Hybridus complex have similar genome sizes whereas previous measures from these species  
431 strongly differ from each other (Bennett and Smith, 1991; Bennett et al., 1998; Ohri et al.,  
432 1981, <http://data.kew.org/cvalues>). A strong variation in genome size was also observed in  
433 the dioecious *A. Acnida* subgenus. Previous molecular studies separated two members of this  
434 taxonomically defined subgenus *A. palmeri* and *A. tuberculatus* into different groups (Lanoue  
435 et al., 1996; Wassom and Tranel, 2005) and our phylogenetic analysis grouped the six species  
436 into two strongly separated clades of three species each, which differ by their average genome  
437 sizes. The genome size of *A. australis* is twice the size of *A. palmeri* and may result from a whole  
438 genome duplication (Mosyakin and Robertson, 1996). The closest relatives of *A. australis* are  
439 *A. floridanus* and *A. tuberculatus*, which also have larger genome sizes than most species. This  
440 indicates that a polyploidization happened during the ancestral split of this group. In contrast,

441 *A. palmeri* and its two closest relatives have the smallest genome sizes of the genus. The test for  
442 random evolution of genome size suggests that both clades deviate significantly from a model of  
443 random evolution due to independent instances of genome duplication and sequence loss (Figure 5).  
444 Genome size may correlate with ecological and life history characteristics (Oyama et al., 2008).  
445 For example, one could postulate that herbicide tolerant weedy amaranths have a smaller genome  
446 size because they are faster cycling than their non-resistant relatives. We found that the genome  
447 sizes of the weedy amaranths in the different subgenera are highly variable and there does not  
448 seem to be a strong relationship between resistance and genome size. For other traits like  
449 mating system the number of species in the genus is currently too limited to allow strong  
450 conclusions regarding the evolution of the genome sizes. In addition to polyploidization, genome  
451 size evolution is also driven by transposable element (TE) dynamics (Bennetzen and Wang,  
452 2014). Since GBS data sample only a small part of the genome and only one draft genome is  
453 currently available from the genus, it is not possible to evaluate the role of TEs in genome size  
454 evolution of the genus with these data.

## 455 5 Conclusions

456 GBS is a suitable approach for the phylogenetic analysis of the *Amaranthus* genus and allows a  
457 high taxonomic resolution. The large number of SNPs obtained from the *de novo* assembly of  
458 GBS sequencing reads and the high congruence of phylogenetic trees based on reference-mapping  
459 and *de novo* assembly indicates that a reference genome is not required and allows to study the  
460 molecular phylogeny of distantly related and non-model species. The inferred phylogeny based  
461 on 35 species largely confirms the previous taxonomic classification into three subgenera but  
462 also identified highly differentiated groups within the tree taxonomically defined subgenera. In  
463 particular, the subgenus *A. Acnida* consists of two strongly different groups with very different  
464 genome sizes, which may warrant a taxonomic revision. The comparison of a coalescent species  
465 tree with a distance-based tree of multiple individual accessions from each species identified  
466 clades in which gene flow, hybridization or geographic differentiation influenced the genomic  
467 relationship of species. The species in the Hybridus complex are closely related and were not  
468 separated along the species boundary, but are split into two main groups of accessions and species

469 that reflect the geographically separated groups from South and Central America, respectively.  
470 The phylogeny of the genus further allowed to pinpoint the most likely ancestors and wild  
471 relatives of cultivated grain amaranths. In particular, *A. hybridus* appears to be the ancestor of  
472 all three crop amaranth species and the weed *A. quitensis* might be an intermediate between *A.*  
473 *hybridus* and *A. caudatus* or have contributed substantially to the domestication of *A. caudatus*  
474 by gene flow. The genome size measurements indicate that polyploidization events were rare in  
475 the genus. As in other plant taxa, further studies like the sequencing of the complete genomes  
476 of Amaranth species will be required to fully understand the relative importance of gene flow,  
477 hybridization and selection on the taxonomic relationships within the genus.

## 478 **Acknowledgements**

479 ¶¶¶¶¶ HEAD We thank the USDA and IPK genebanks for providing the seeds used in this study  
480 and to David Brenner, Amaranth Curator of the USDA genebank for advice and discussion. We  
481 are grateful to Elisabeth Kokai-Kota for technical assistance in the laboratory. This work was  
482 supported by the F. W. Schnell Endowed Professorship of the Stifterverband für Deutsche Wis-  
483 senschaft to K. J. S. We also acknowledge support by the state of Baden-Württemberg through  
484 bwHPC. ===== We thank the USDA and IPK genebanks for providing the seeds used  
485 in this study and to David Brenner, Amaranth Curator of the USDA genebank for advice and  
486 discussion. We are grateful to Elisabeth Kokai-Kota for technical assistance in the laboratory.  
487 We also acknowledge support by the state of Baden-Württemberg through bwHPC. This work  
488 was supported by the F. W. Schnell Endowed Professorship of the Stifterverband für Deutsche  
489 Wissenschaft to K. J. S. [iiiii ef5f630d3e154c93569e5849a17268d3780613ba](https://doi.org/10.1101/085472)

## References

- 490
- 491 Adhikary, D., Pratt, D.B. 2015. Morphologic and taxonomic analysis of the weedy and cultivated  
492 *Amaranthus hybridus* species complex. *Syst. Bot.* 40, 604–610.
- 493 Andrews, K.R., Good, J.M., Miller, M.R., Luikart, G., Hohenlohe, P.A. 2016. Harnessing the  
494 power of RADseq for ecological and evolutionary genomics. *Nat. Rev. Genet.* 17, 81–92.
- 495 Ariani, A., Berny Mier y Teran, J.C., Gepts, P. 2016. Genome-wide identification of SNPs  
496 and copy number variation in common bean (*Phaseolus vulgaris* L.) using genotyping-by-  
497 sequencing (GBS). *Mol. Breeding* 36, 87.
- 498 Behera, B., Patnaik, S.N. 1982. Genome analysis of *Amaranthus dubius* Mart. ex Thell. through  
499 the study of *Amaranthus spinosus* × *A. dubius* hybrids. *Cytologia* 47, 379–389.
- 500 Bennett, M.D., Leitch, I.J., Hanson, L. 1998. DNA amounts in two samples of angiosperm  
501 weeds. *Ann. Bot.* 82, 121–134.
- 502 Bennett, M.D., Smith, J.B. 1991. Nuclear DNA amounts in angiosperms. *Phil. Trans. Roy. Soc.*  
503 *B* 334, 309–345.
- 504 Bennetzen, J.L., Wang, H. 2014. The contributions of transposable elements to the structure,  
505 function, and evolution of plant genomes. *Ann. Rev. Plant Biol.* 65, 505–530.
- 506 Bensch, C.N., Horak, M.J., Peterson, D. 2003. Interference of redroot pigweed (*Amaranthus*  
507 *retroflexus*), Palmer amaranth (*A. palmeri*), and common waterhemp (*A. rudis*) in soybean.  
508 *Weed Sci.* 51, 37–43.
- 509 Bouckaert, R., Heled, J., Kühnert, D., Vaughan, T., Wu, C.H., Xie, D., Suchard, M.A., Ram-  
510 baut, A., Drummond, A.J. 2014. BEAST 2: A software platform for bayesian evolutionary  
511 analysis. *PLOS Comp. Biol.* 10, 1–6.
- 512 Brenner, D.M., Johnson, W.G., Sprague, C.L., Tranel, P.J., Young, B.G. 2013. Crop–weed  
513 hybrids are more frequent for the grain amaranth ‘Plainsman’ than for ‘D136-1’. *Gen. Res.*  
514 *Crop Evol.* 60, 2201–2205.
- 515 Browning, B.L., Browning, S.R. 2016. Genotype imputation with millions of reference samples.  
516 *Am. J. Hum. Genet.* 98, 116–126.
- 517 Bryant, D., Bouckaert, R., Felsenstein, J., Rosenberg, N.A., RoyChoudhury, A. 2012. Inferring  
518 species trees directly from biallelic genetic markers: Bypassing gene trees in a full coalescent  
519 analysis. *Mol. Biol. Evol.* 29, 1917–1932.
- 520 Bryant, D., Moulton, V. 2004. Neighbor-net: an agglomerative method for the construction of  
521 phylogenetic networks. *Mol. Biol. Evol.* 21, 255–65.
- 522 Catchen, J., Hohenlohe, P.A., Bassham, S., Amores, A., Cresko, W.A. 2013. Stacks: an analysis  
523 tool set for population genomics. *Mol. Ecol.* 22, 3124–40.
- 524 Catchen, J.M., Amores, A., Hohenlohe, P., Cresko, W., Postlethwait, J.H. 2011. Stacks: building  
525 and genotyping Loci de novo from short-read sequences. *G3* 1, 171–82.
- 526 Chan, K.F., Sun, M. 1997. Genetic diversity and relationships detected by isozyme and RAPD  
527 analysis of crop and wild species of *Amaranthus*. *Theor. Appl. Genet.* 95, 865–873.

- 528 Clouse, J.W., Adhikary, D., Page, J.T., Ramaraj, T., Deyholos, M.K., Udall, J.A., Fairbanks,  
529 D.J., Jellen, E.N., Maughan, P.J. 2016. The amaranth genome: Genome, transcriptome, and  
530 physical map assembly. *Plant Genome* 9.
- 531 Coons, M. 1982. Relationships of *Amaranthus caudatus*. *Econ. Bot.* 36, 129–146.
- 532 Coons, M.P. 1978. The status of *Amaranthus hybridus* L. in South America. *Cienc. Nat.* 18.
- 533 Costea, M., DeMason, D. 2001. Stem morphology and anatomy in *Amaranthus* L. (*Amaran-*  
534 *thaceae*), taxonomic significance. *J. Torrey Bot. Soc.* 128, 254–281.
- 535 DaCosta, J.M., Sorenson, M.D. 2016. ddRAD-seq phylogenetics based on nucleotide, indel, and  
536 presence–absence polymorphisms: Analyses of two avian genera with contrasting histories.  
537 *Mol. Phyl. Evol.* 94, 122–135.
- 538 Danecek, P., Auton, A., Abecasis, G., Albers, C.A., Banks, E., DePristo, M.A., Handsaker,  
539 R.E., Lunter, G., Marth, G.T., Sherry, S.T., McVean, G., Durbin, R. 2011. The variant call  
540 format and VCFtools. *Bioinformatics* 27, 2156–8.
- 541 Das, S. 2014. Domestication, phylogeny and taxonomic delimitation in underutilized grain  
542 *Amaranthus* (Amaranthaceae) - a status review. *Feddes Rep.* 1–10.
- 543 Davis, A.S., Schutte, B.J., Hager, A.G., Young, B.G. 2015. Palmer amaranth (*Amaranthus*  
544 *palmeri*) damage niche in Illinois soybean is seed limited. *Weed Sci.* 63, 658–668.
- 545 Dohm, J.C., Minoche, A.E., Holtgräwe, D., Capella-Gutiérrez, S., Zakrzewski, F., Tafer, H.,  
546 Rupp, O., Sörensen, T.R., Stracke, R., Reinhardt, R., Goesmann, A., Kraft, T., Schulz, B.,  
547 Stadler, P.F., Schmidt, T., Gabaldón, T., Lehrach, H., Weisshaar, B., Himmelbauer, H. 2014.  
548 The genome of the recently domesticated crop plant sugar beet (*Beta vulgaris*). *Nature* 505,  
549 546–9.
- 550 Dolezel, J., Bartos, J., Voglmayr, H., Greilhuber, J. 2003. Nuclear DNA content and genome  
551 size of trout and human. *Cytometry A* 51, 127–8; author reply 129.
- 552 Dolezel, J., Sgorbati, S., Lucretti, S. 1992. Comparison of three DNA fluorochromes for flow  
553 cytometric estimation of nuclear DNA content in plants. *Physiol. Plant.* 85, 625–631.
- 554 Eaton, D.A.R., Ree, R.H. 2013. Inferring phylogeny and introgression using RADseq data: An  
555 example from flowering plants (*Pedicularis: Orobanchaceae*). *Syst. Biol.* 62, 689–706.
- 556 Elshire, R.J., Glaubitz, J.C., Sun, Q., Poland, J.A., Kawamoto, K., Buckler, E.S., Mitchell, S.E.  
557 2011. A robust, simple genotyping-by-sequencing (GBS) approach for high diversity species.  
558 *PLOS ONE* 6, e19379.
- 559 Greizerstein, E.J., Poggio, L. 1994. Karyological studies in grain amaranths. *Cytologia* 59,  
560 25–30.
- 561 Harvey, M.G., Smith, B.T., Glenn, T.C., Faircloth, B.C., Brumfield, R.T. 2016. Sequence  
562 capture versus restriction site associated DNA sequencing for shallow systematics. *Syst. Biol.*  
563 .
- 564 Huson, D.H., Bryant, D. 2006. Application of phylogenetic networks in evolutionary studies.  
565 *Mol. Biol. Evol.* 23, 254–67.

- 566 Jimenez, F.R., Maughan, P.J., Alvarez, A., Kietlinski, K.D., Smith, S.M., Pratt, D.B., Elzinga,  
567 D.B., Jellen, E.N. 2013. Assessment of genetic diversity in Peruvian amaranth (*Amaranthus*  
568 *caudatus* and *A. hybridus*) germplasm using single nucleotide polymorphism markers. *Crop*  
569 *Sci.* 53, 532.
- 570 Khaing, A.A., Moe, K.T., Chung, J.W., Baek, H.J., Park, Y.J. 2013. Genetic diversity and  
571 population structure of the selected core set in *Amaranthus* using SSR markers. *Plant Breed.*  
572 132, 165–173.
- 573 Kietlinski, K.D., Jimenez, F., Jellen, E.N., Maughan, P.J., Smith, S.M., Pratt, D.B. 2014. Rela-  
574 tionships between the weedy *Amaranthus hybridus* (*Amaranthaceae*) and the grain amaranths.  
575 *Crop Sci.* 54, 220.
- 576 Kolano, B., McCann, J., Orzechowska, M., Siwinska, D., Temsch, E., Weiss-Schneeweiss, H.  
577 2016. Molecular and cytogenetic evidence for an allotetraploid origin of *Chenopodium quinoa*  
578 and *C. berlandieri* (*Amaranthaceae*). *Mol. Phy. Evol.* 100, 109–123.
- 579 Lanoue, K.Z., Wolf, P.G., Browning, S., Hood, E.E. 1996. Phylogenetic analysis of restriction-  
580 site variation in wild and cultivated *Amaranthus* species (*Amaranthaceae*). *Theor. Appl.*  
581 *Genet.* 93, 722–32.
- 582 Li, H., Durbin, R. 2009. Fast and accurate short read alignment with Burrows-Wheeler trans-  
583 form. *Bioinformatics* 25, 1754–1760.
- 584 Li, H., Handsaker, B., Wysoker, A., Fennell, T., Ruan, J., Homer, N., Marth, G., Abecasis,  
585 G., Durbin, R. 2009. The sequence alignment/map format and SAMtools. *Bioinformatics* 25,  
586 2078–2079.
- 587 Mastretta-Yanes, a., Arrigo, N., Alvarez, N., Jorgensen, T.H., Piñero, D., Emerson, B.C. 2015.  
588 Restriction site-associated DNA sequencing, genotyping error estimation and *de novo* assem-  
589 bly optimization for population genetic inference. *Mol. Ecol. Res.* 15, 28–41.
- 590 Mosyakin, S.L., Robertson, K.R. 1996. New infrageneric taxa and combinations in *Amaranthus*  
591 (*Amaranthaceae*). *Ann. Bot. Fenn.* 33, 275–281.
- 592 Nicotra, A.B., Chong, C., Bragg, J.G., Ong, C.R., Aitken, N.C., Chuah, A., Lepschi, B., Bore-  
593 vitz, J.O. 2016. Population and phylogenomic decomposition via genotyping-by-sequencing  
594 in Australian *Pelargonium*. *Mol. Ecol.* 25, 2000–2014.
- 595 Ohri, D., Nazeer, M.A., M, P. 1981. Cytophotometric estimation of nuclear DNA in some  
596 ornamentals. *Nucleus* 24, 39–42.
- 597 Oyama, R.K., Clauss, M.J., Formanová, N., Kroymann, J., Schmid, K.J., Vogel, H., Weniger,  
598 K., Windsor, A.J., Mitchell-Olds, T. 2008. The shrunken genome of *Arabidopsis thaliana*.  
599 *Plant Sys. Evol.* 273, 257–271.
- 600 Paradis, E., Claude, J., Strimmer, K. 2004. APE: Analyses of phylogenetics and evolution in R  
601 language. *Bioinformatics* 20, 289–290.
- 602 Park, Y.J., Nishikawa, T., Matsushima, K., Minami, M., Tomooka, N., Nemoto, K. 2014. Molec-  
603 ular characterization and genetic diversity of the starch branching enzyme (SBE) gene from  
604 *Amaranthus*: the evolutionary origin of grain amaranths. *Mol. Breed.* 34, 1975–1985.
- 605 Paul, S., Fe, S., Paul, S. 2013. Phylogenetic signal variation in the genomes of *Medicago*  
606 (*Fabaceae*). *Syst. Biol.* 62, 424–438.

- 607 Poland, J.A., Brown, P.J., Sorrells, M.E., Jannink, J.L. 2012. Development of high-density  
608 genetic maps for barley and wheat using a novel two-enzyme genotyping-by-sequencing ap-  
609 proach. PLOS ONE 7, e32253.
- 610 R Core Team. 2014. R: A language and environment for statistical computing. R Foundation  
611 for Statistical Computing, Vienna, Austria.
- 612 Rastogi, A., Shukla, S. 2013. Amaranth: a new millennium crop of nutraceutical values. Crit.  
613 Rev. Food Sci. Nutr. 53, 109–25.
- 614 Revell, L.J. 2012. phytools: an r package for phylogenetic comparative biology (and other  
615 things). Meth. Ecol. Evol. 3, 217–223.
- 616 Saghai-Marooif, M.A., Soliman, K.M., Jorgensen, R.A., Allard, R.W. 1984. Ribosomal DNA  
617 spacer-length polymorphisms in barley: mendelian inheritance, chromosomal location, and  
618 population dynamics. Proc. Natl. Acad. Sci. USA 81, 8014–8018.
- 619 Sauer, J. 1967. The grain amaranths and their relatives: a revised taxonomic and geographic  
620 survey. Ann. Missouri Bot. Gard. 54, 103–137.
- 621 Steckel, L.E., Sprague, C.L. 2004. Common waterhemp (*Amaranthus rudis*) interference in corn.  
622 Weed Sci. 52, 359–364.
- 623 Stetter, M.G., Müller, T., Schmid, K. 2015. Incomplete domestication of South American grain  
624 amaranth (*Amaranthus caudatus*) from its wild relatives. bioRxiv doi:10.1101/025866.
- 625 Stetter, M.G., Zeitler, L., Steinhaus, A., Kroener, K., Biljecki, M., Schmid, K.J. 2016. Crossing  
626 methods and cultivation conditions for rapid production of segregating populations in three  
627 grain amaranth species. Front. Plant. Sci. 7, 816.
- 628 Trucco, F., Jeschke, M.R., Rayburn, A.L., Tranel, P.J. 2005. *Amaranthus hybridus* can be  
629 pollinated frequently by *A. tuberculatus* under field conditions. Heredity 94, 64–70.
- 630 Trucco, F., Tranel, P.J. 2011. Wild crop relatives: Genomic and breeding resources. Springer  
631 Berlin Heidelberg, Berlin, Heidelberg.
- 632 Wassom, J.J., Tranel, P.J. 2005. Amplified fragment length polymorphism-based genetic rela-  
633 tionships among weedy *Amaranthus* species. J. Hered. 96, 410–416.
- 634 Xu, F., Sun, M. 2001. Comparative analysis of phylogenetic relationships of grain amaranths and  
635 their wild relatives (*Amaranthus*; *Amaranthaceae*) using internal transcribed spacer, amplified  
636 fragment length polymorphism, and double-primer fluorescent intersimple sequence. Mol.  
637 Phyl. Evol. 21, 372–387.



638 **Figure titles**

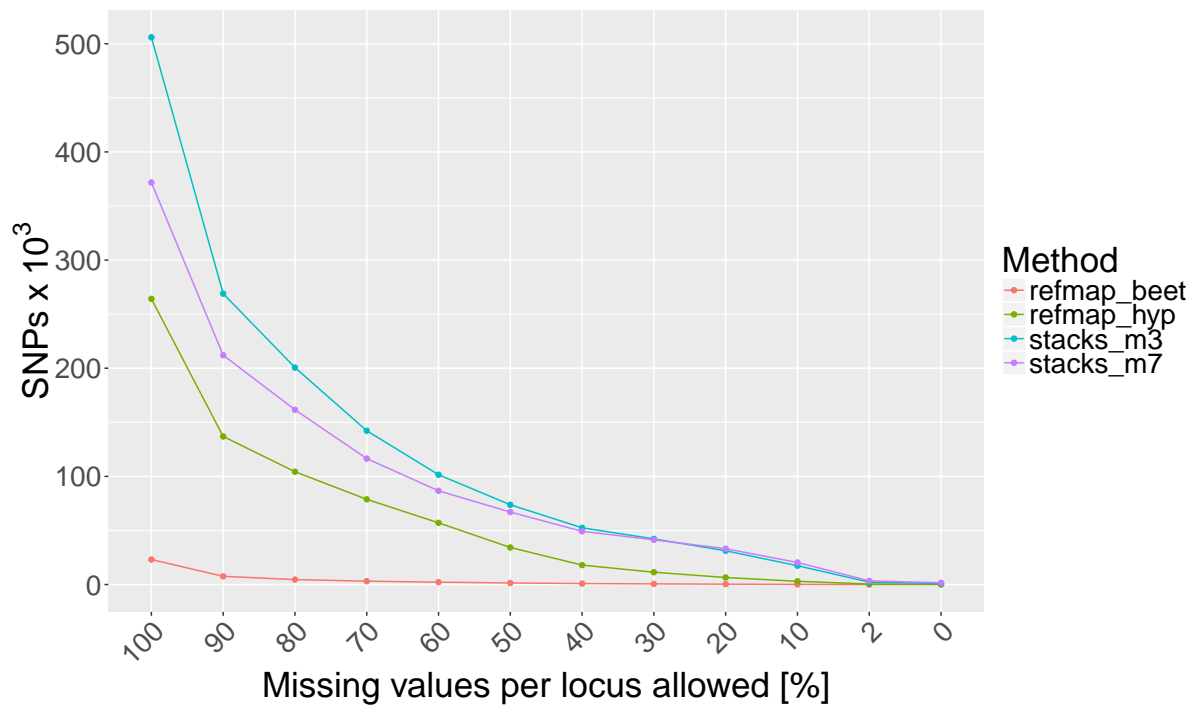

Figure 1: Number of SNPs recovered at different levels of missing values allowed per locus. Data sets are labeled as follows: *refmap\_beet*, reference mapping against sugar beet; *refmap\_hyp*, reference mapping against *Amaranthus hypochondriacus*; *stacks\_m3*, *de novo* assembly with Stacks using parameter value  $m = 3$  for minimal read coverage and *stacks\_m7*, parameter value  $m = 7$ .

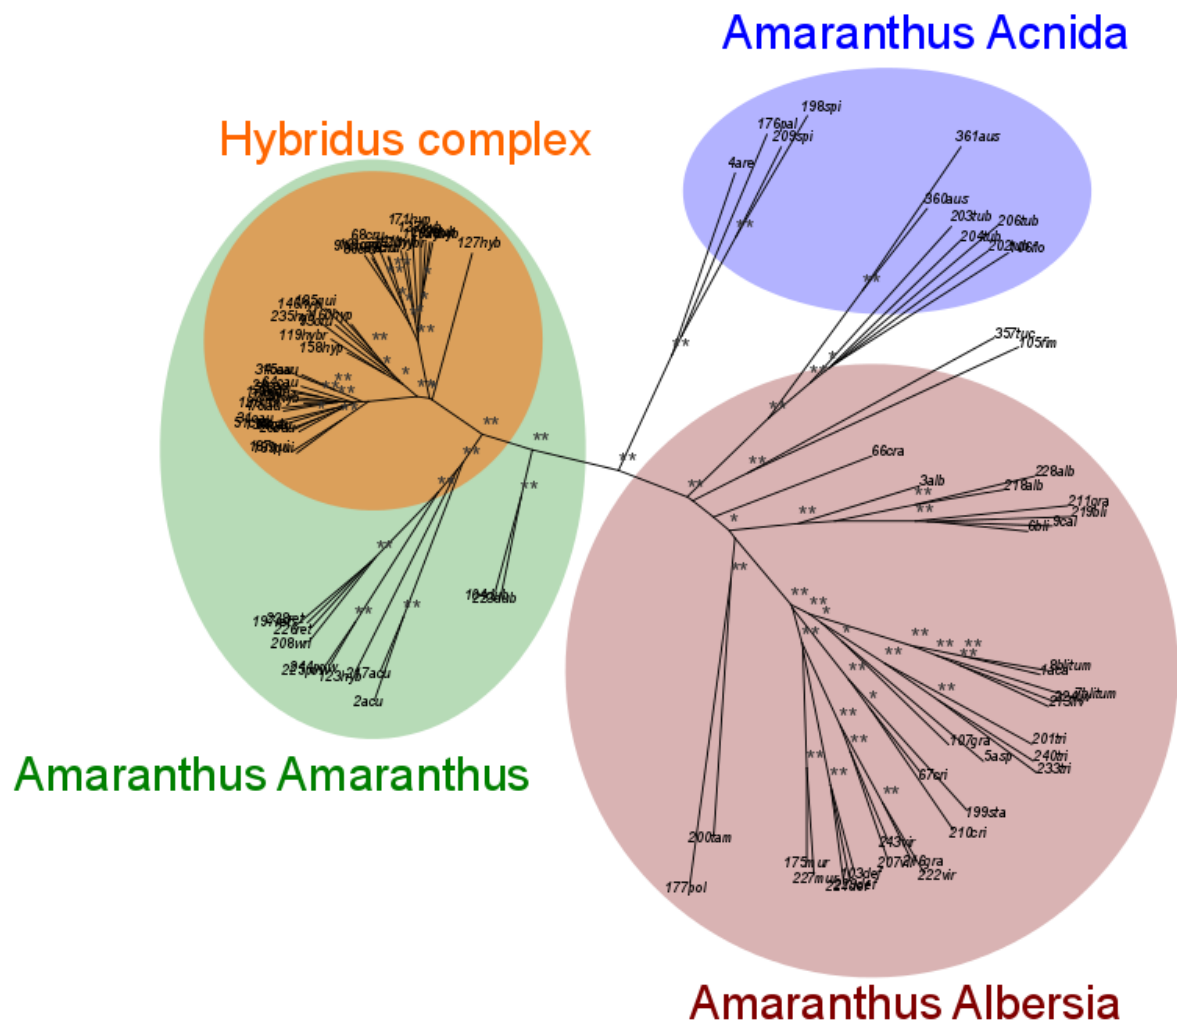

Figure 2: Neighbor joining tree calculated from the Euclidean distances of 94 individuals representing 35 *Amaranthus* species. Single stars (\*) indicate bootstrap values over 90% and double stars (\*\*) indicate bootstrap values of 100%.

Figure 3: Section of the NeighborNet network showing the Hybridus complex. The blue circle includes the Central American grain amaranths (*A. hypochondriacus*, *A. cruentus*) and the close wild relative *A. hybridus*. The green circle includes South American grain amaranth (*A. caudatus*) and the potential ancestors (*A. hybridus* and *A. quitensis*). The country of origin according to the genebank passport information is shown at the end of the name of each accession. The whole network is shown in supplementary figure S1.

Figure 4: Species tree of *Amaranthus* based on the multispecies coalescent calculated with SNAPP. The cloudogram (green lines) represents 3980 individual trees and the consensus tree is shown in blue color.

Figure 5: Genome size evolution mapped onto consensus tree obtained with SNAPP. The branch labels show posterior probabilities of genome size estimates of interior nodes obtained with a Maximum Likelihood method implemented in the fastAnc function of the phytools R package. Branch colors show estimated genome sizes in Mbp. Stars (\*) indicate deviation from random evolution of genome size at 95% confidence level based on a two-tailed test. Group labels annotate taxonomic subgenera.

## 639 Tables

Table 1: List of samples included in this study

| D   | species                 | accession number | Genebank | Country   |
|-----|-------------------------|------------------|----------|-----------|
| 1   | <i>A. acanthochiton</i> | PI 632238 *      | USDA/ARS | USA       |
| 2   | <i>A. acutilobus</i>    | PI 633579        | USDA/ARS |           |
| 3   | <i>A. albus</i>         | PI 608029        | USDA/ARS | USA       |
| 4   | <i>A. arenicola</i>     | PI 667167        | USDA/ARS | Mexico    |
| 5   | <i>A. asplundii</i>     | PI 604196 *      | USDA/ARS | Ecuador   |
| 6   | <i>A. blitoides</i>     | PI 649301        | USDA/ARS | USA       |
| 7   | <i>A. blitum</i>        | PI 490298        | USDA/ARS | Kenya     |
| 8   | <i>A. blitum</i>        | PI 612860        | USDA/ARS | USA       |
| 9   | <i>A. californicus</i>  | PI 595319        | USDA/ARS | USA       |
| 15  | <i>A. caudatus</i>      | PI 511680 *      | USDA/ARS | Argentina |
| 26  | <i>A. caudatus</i>      | PI 642741        | USDA/ARS | Bolivia   |
| 28  | <i>A. caudatus</i>      | PI 649230 †      | USDA/ARS | Peru      |
| 31  | <i>A. caudatus</i>      | PI 649235 †      | USDA/ARS | Peru      |
| 34  | <i>A. caudatus</i>      | PI 511679 * †    | USDA/ARS | Argentina |
| 47  | <i>A. caudatus</i>      | PI 649217 †      | USDA/ARS | Peru      |
| 50  | <i>A. caudatus</i>      | PI 511681 * †    | USDA/ARS | Bolivia   |
| 51  | <i>A. caudatus</i>      | PI 649228 *      | USDA/ARS | Peru      |
| 58  | <i>A. caudatus</i>      | PI 608019        | USDA/ARS | Ecuador   |
| 64  | <i>A. caudatus</i>      | Ames 5302 †      | USDA/ARS | Peru      |
| 66  | <i>A. crassipes</i>     | PI 649302        | USDA/ARS | USA       |
| 67  | <i>A. crispus</i>       | PI 633582        | USDA/ARS |           |
| 68  | <i>A. cruentus</i>      | PI 511714 *      | USDA/ARS | Peru      |
| 76  | <i>A. cruentus</i>      | PI 667160        | USDA/ARS | Guatemala |
| 80  | <i>A. cruentus</i>      | PI 576481        | USDA/ARS | Mexico    |
| 89  | <i>A. cruentus</i>      | PI 433228 * †    | USDA/ARS | Guatemala |
| 91  | <i>A. cruentus</i>      | PI 658728 †      | USDA/ARS | Mexico    |
| 93  | <i>A. cruentus</i>      | PI 511876        | USDA/ARS | Mexico    |
| 101 | <i>A. cruentus</i>      | PI 643037 †      | USDA/ARS | Mexico    |
| 103 | <i>A. deflexus</i>      | PI 667169        | USDA/ARS | Argentina |
| 104 | <i>A. dubius</i>        | Ames 25792 *     | USDA/ARS | Panama    |
| 105 | <i>A. fimbriatus</i>    | PI 605738        | USDA/ARS | Mexico    |
| 106 | <i>A. floridanus</i>    | PI 553078        | USDA/ARS | USA       |
| 107 | <i>A. graecizans</i>    | PI 173837        | USDA/ARS | India     |
| 110 | A. hybr.                | PI 604571 †      | USDA/ARS | Mexico    |
| 119 | A. hybr.                | PI 604564 †      | USDA/ARS | Mexico    |
| 120 | A. hybr.                | PI 604566 †      | USDA/ARS | Mexico    |

| ID  | Species                   | Accession number | Genebank | Country   |
|-----|---------------------------|------------------|----------|-----------|
| 123 | <i>A. hybridus</i>        | Ames 5232 †      | USDA/ARS | Peru      |
| 127 | <i>A. hybridus</i>        | PI 636180        | USDA/ARS | Colombia  |
| 134 | <i>A. hybridus</i>        | PI 667156        | USDA/ARS | Ecuador   |
| 137 | <i>A. hybridus</i>        | PI 604568 †      | USDA/ARS | Mexico    |
| 138 | <i>A. hybridus</i>        | PI 604574        | USDA/ARS | Mexico    |
| 140 | <i>A. hybridus</i>        | Ames 5335 *      | USDA/ARS | Bolivia   |
| 141 | <i>A. hypochondriacus</i> | PI 649587        | USDA/ARS | Mexico    |
| 146 | <i>A. hypochondriacus</i> | PI 633589        | USDA/ARS | Mexico    |
| 158 | <i>A. hypochondriacus</i> | PI 604595 †      | USDA/ARS | Mexico    |
| 160 | <i>A. hypochondriacus</i> | PI 649529        | USDA/ARS | Mexico    |
| 171 | <i>A. hypochondriacus</i> | PI 652432        | USDA/ARS | Brazil    |
| 175 | <i>A. muricatus</i>       | PI 633583        | USDA/ARS | Spain     |
| 176 | <i>A. palmeri</i>         | PI 633593        | USDA/ARS | Mexico    |
| 177 | <i>A. polygonoides</i>    | PI 658733        | USDA/ARS | USA       |
| 178 | <i>A. quitensis</i>       | PI 511747        | USDA/ARS | Ecuador   |
| 185 | <i>A. quitensis</i>       | PI 652426        | USDA/ARS | Brazil    |
| 187 | <i>A. quitensis</i>       | PI 652428 †      | USDA/ARS | Brazil    |
| 189 | <i>A. quitensis</i>       | PI 652422        | USDA/ARS | Brazil    |
| 192 | <i>A. quitensis</i>       | PI 511736 * †    | USDA/ARS | Bolivia   |
| 196 | <i>A. quitensis</i>       | Ames 5342        | USDA/ARS | Peru      |
| 197 | <i>A. retroflexus</i>     | PI 603852        | USDA/ARS | USA       |
| 198 | <i>A. spinosus</i>        | PI 500237        | USDA/ARS | Zambia    |
| 199 | <i>A. standleyanus</i>    | PI 605739        | USDA/ARS | Argentina |
| 200 | <i>A. tamaulipensis</i>   | PI 642738        | USDA/ARS | Cuba      |
| 201 | <i>A. tricolor</i>        | PI 603896        | USDA/ARS |           |
| 202 | <i>A. tuberculatus</i>    | PI 604247        | USDA/ARS | USA       |
| 203 | <i>A. tuberculatus</i>    | PI 603865        | USDA/ARS | USA       |
| 204 | <i>A. tuberculatus</i>    | PI 603872        | USDA/ARS | USA       |
| 206 | <i>A. tuberculatus</i>    | Ames 24593       | USDA/ARS | USA       |
| 207 | <i>A. viridis</i>         | PI 654388        | USDA/ARS | USA       |
| 208 | <i>A. wrightii</i>        | PI 632243        | USDA/ARS | USA       |
| 209 | <i>A. spinosus</i>        | AMA 13           | IPK      |           |
| 210 | <i>A. crispus</i>         | AMA 14           | IPK      |           |
| 211 | <i>A. graecizans</i>      | AMA 24           | IPK      |           |
| 213 | <i>A. lividus</i>         | AMA 49           | IPK      |           |
| 216 | <i>A. graecizans</i>      | AMA 62           | IPK      |           |
| 217 | <i>A. acutilobus</i>      | AMA 63           | IPK      |           |
| 218 | <i>A. albus</i>           | AMA 65           | IPK      | Canada    |
| 219 | <i>A. blitoides</i>       | AMA 66           | IPK      |           |
| 221 | <i>A. deflexus</i>        | AMA 76           | IPK      |           |
| 222 | <i>A. viridis</i>         | AMA 79           | IPK      | Peru      |
| 223 | <i>A. dubius</i>          | AMA 80           | IPK      | Rwanda    |
| 224 | <i>A. lividus</i>         | AMA 87           | IPK      | Rwanda    |
| 225 | <i>A. powellii</i>        | AMA 89           | IPK      | Rwanda    |
| 226 | <i>A. retroflexus</i>     | AMA 93           | IPK      | Mexico    |
| 227 | <i>A. muricatus</i>       | AMA 95           | IPK      |           |
| 228 | <i>A. albus</i>           | AMA 96           | IPK      |           |

| ID  | Species               | Accession number | Genebank | Country |
|-----|-----------------------|------------------|----------|---------|
| 229 | <i>A. deflexus</i>    | AMA 97           | IPK      |         |
| 233 | <i>A. tricolor</i>    | AMA 149          | IPK      |         |
| 235 | <i>A. hybr.</i>       | AMA 147 †        | IPK      |         |
| 238 | <i>A. retroflexus</i> | AMA 105          | IPK      | China   |
| 240 | <i>A. tricolor</i>    | AMA 126          | IPK      | Cuba    |
| 242 | <i>A. dubius</i>      | AMA 140          | IPK      | Spain   |
| 243 | <i>A. viridis</i>     | AMA 175          | IPK      |         |
| 244 | <i>A. powellii</i>    | AMA 170          | IPK      | Germany |
| 357 | <i>A. tucsonensis</i> | PI 664490        | IPK      | USA     |
| 360 | <i>A. australis</i>   | PI 553076        | IPK      | USA     |
| 361 | <i>A. australis</i>   | PI 553077        | IPK      | USA     |

\* Accessions not included in genome size measurements

† Accessions not included in SNAPP analysis

Table 2: Summary of four GBS datasets obtained by different SNP calling methods and parameters.

| Name        | Reference map           | Tool          | Mapped reads         | SNPs  | Missing (%) |
|-------------|-------------------------|---------------|----------------------|-------|-------------|
| refmap_hyp  | Ahypochochondriacus_1.0 | BWA, Samtools | 166,935,845 (74.8%)  | 2,978 | 5.2         |
| refmap_beet | RefBeet-1_2             | BWA, Samtools | 57,766,877 (25.9%)   | 1,439 | 31.7        |
| stacks_m3   | <i>de novo</i> catalog  | Stacks        | 223,104,991 (100.0%) | 2,181 | 0.6         |
| stacks_m7   | <i>de novo</i> catalog  | Stacks        | 223,104,991 (100.0%) | 3,416 | 0.6         |

Table 3: Estimated genome size of *Amaranthus* species.  $n$  is the number of genotypes sampled per species.

| species                                        | $n$ | Size (Mbp) | Standard Error | Lower CI | Upper CI |
|------------------------------------------------|-----|------------|----------------|----------|----------|
| <i>A. acutilobus</i>                           | 3   | 532.5      | 34.3           | 463.8    | 601.2    |
| <i>A. albus</i>                                | 3   | 530.3      | 33.4           | 463.2    | 597.3    |
| <i>A. arenicola</i>                            | 1   | 438.6      | 57.1           | 323.9    | 553.3    |
| <i>A. asplundii</i>                            | 1   | 535.0      | 57.1           | 420.2    | 649.7    |
| <i>A. australis</i>                            | 2   | 824.2      | 44.4           | 735.7    | 912.8    |
| <i>A. blitoides</i>                            | 3   | 521.9      | 33.4           | 454.8    | 588.9    |
| <i>A. blitum</i>                               | 2   | 748.8      | 40.6           | 667.2    | 830.4    |
| <i>A. californicus</i>                         | 1   | 547.9      | 57.1           | 433.2    | 662.6    |
| <i>A. caudatus</i>                             | 6   | 502.0      | 24.0           | 453.6    | 550.4    |
| <i>A. crassipes</i>                            | 1   | 512.5      | 62.4           | 388.1    | 637.0    |
| <i>A. crispus</i>                              | 2   | 576.0      | 40.6           | 494.4    | 657.6    |
| <i>A. cruentus</i>                             | 5   | 510.9      | 26.1           | 458.3    | 563.6    |
| <i>A. deflexus</i>                             | 3   | 640.2      | 33.4           | 573.1    | 707.2    |
| <i>A. dubius</i>                               | 2   | 711.9      | 40.6           | 630.3    | 793.5    |
| <i>A. fimbriatus</i>                           | 1   | 527.2      | 57.1           | 412.5    | 641.9    |
| <i>A. floridanus</i>                           | 1   | 658.2      | 57.1           | 543.5    | 772.9    |
| <i>A. graecizans</i>                           | 3   | 541.0      | 33.4           | 473.9    | 608.0    |
| <i>A. hybr.</i>                                | 3   | 508.0      | 33.4           | 440.9    | 575.0    |
| <i>A. hybridus</i>                             | 5   | 503.8      | 26.1           | 451.1    | 556.4    |
| <i>A. hybridus</i> x <i>A. hypochondriacus</i> | 1   | 523.8      | 57.1           | 409.1    | 638.5    |
| <i>A. hypochondriacus</i>                      | 5   | 506.4      | 26.1           | 453.7    | 559.0    |
| <i>A. lividus</i>                              | 2   | 685.8      | 40.6           | 604.2    | 767.4    |
| <i>A. muricatus</i>                            | 2   | 729.6      | 40.6           | 648.0    | 811.2    |
| <i>A. palmeri</i>                              | 1   | 421.8      | 57.1           | 307.1    | 536.5    |
| <i>A. polygonoides</i>                         | 1   | 512.3      | 57.1           | 397.6    | 627.0    |
| <i>A. powellii</i>                             | 2   | 512.3      | 40.6           | 430.7    | 593.9    |
| <i>A. quitensis</i>                            | 4   | 501.1      | 29.6           | 441.5    | 560.6    |
| <i>A. retroflexus</i>                          | 3   | 555.6      | 33.4           | 488.6    | 622.7    |
| <i>A. spinosus</i>                             | 2   | 471.6      | 40.6           | 390.0    | 553.2    |
| <i>A. standleyanus</i>                         | 1   | 502.9      | 57.1           | 388.2    | 617.6    |
| <i>A. tamaulipensis</i>                        | 1   | 524.9      | 57.1           | 410.2    | 639.6    |
| <i>A. tricolor</i>                             | 3   | 782.7      | 33.4           | 715.7    | 849.8    |
| <i>A. tuberculatus</i>                         | 4   | 675.6      | 27.0           | 621.4    | 729.8    |
| <i>A. tucsonensis</i>                          | 1   | 510.4      | 57.1           | 395.7    | 625.1    |
| <i>A. viridis</i>                              | 3   | 543.1      | 33.4           | 476.1    | 610.2    |
| <i>A. wrightii</i>                             | 1   | 534.3      | 57.1           | 419.6    | 649.0    |
